# Supplementary material
Source: PubMed Central journal article supplement (PMC8040497)
Supplement: flgastro-2020-101633supp002.pdf [file flgastro-2020-101633supp002.pdf]

**Audit of patient access to information during COVID-19 - Survey**

|                                                                                                                                                                                                                                                                                                                                                                                                                                                                                                                                                                                                                                                                                                                                      |
|--------------------------------------------------------------------------------------------------------------------------------------------------------------------------------------------------------------------------------------------------------------------------------------------------------------------------------------------------------------------------------------------------------------------------------------------------------------------------------------------------------------------------------------------------------------------------------------------------------------------------------------------------------------------------------------------------------------------------------------|
| <b>Patient Name:</b> _____ <b>Survey date:</b> _____ <b>Completed by:</b> _____<br><b>PID:</b> _____ <b>Age:</b> _____ <b>Gender:</b> _____ <b>Ethnicity:</b> _____<br><b>UC/CD/IBDU:</b> _____ <b>IBD team assessed Covid-19 risk:</b> _____<br><b>Comorbidities:</b> _____<br><b>IBD Medications at start of Feb 2020:</b> _____<br><b>Current IBD medication:</b> _____                                                                                                                                                                                                                                                                                                                                                           |
| <b>Approximately when were you first concerned about Covid-19 and its impact on your health?</b><br><input type="checkbox"/> Before first case in UK <input type="checkbox"/> First case in UK <input type="checkbox"/> WHO declared a pandemic <input type="checkbox"/> 1-2 weeks before lockdown<br><input type="checkbox"/> UK going into lockdown <input type="checkbox"/> Not been concerned <input type="checkbox"/> Other _____                                                                                                                                                                                                                                                                                               |
| <b>Did you contact your IBD team for COVID-19 advice?</b><br><input type="checkbox"/> Yes - how satisfactory was this advice? _____ 1 - 10 (1 being extremely unsatisfied and 10 being very satisfied)<br><input type="checkbox"/> No - why _____                                                                                                                                                                                                                                                                                                                                                                                                                                                                                    |
| <b>What has been your main source of help and advice during this pandemic?</b><br><input type="checkbox"/> Online (how? - search engines - if so what websites did you get your information from or CCUK site (direct search (ie CCUK) or via search engine with looking for coronavirus information)<br>_____<br><input type="checkbox"/> Patient forums <input type="checkbox"/> Facebook <input type="checkbox"/> Twitter <input type="checkbox"/> Other media _____<br><input type="checkbox"/> Government media / news <input type="checkbox"/> IBD Helpline <input type="checkbox"/> Via clinic consultations<br><input type="checkbox"/> GP <input type="checkbox"/> Did not seek advice <input type="checkbox"/> Other _____ |
| <b>Did the advice you got these sources alleviate your anxiety and concerns?</b><br><input type="checkbox"/> Yes <input type="checkbox"/> No - why _____<br>(immunosuppression, IBD activity, risk of infection / outcome, work related and social distancing etc).                                                                                                                                                                                                                                                                                                                                                                                                                                                                  |

**Where there any barriers to seeking or receiving information?**

(Both information they searched for online and received directly via the hospital)

- Could not understand it                       Could not understand its relevance to me
- Inadequate or unsatisfactory information, did not feel reassured
- Conflicting information based on multiple sources of assessment
- Had questions and concerns that weren't answered
- Language barrier - if so which languages do they speak / read \_\_\_\_\_
- How did they get around this if they did? \_\_\_\_\_

**Are you aware of your risk status?**  Yes     No

- If no then what is your perceived risk (high, moderate, low)? \_\_\_\_\_

**How did you get your risk assessment done (if patient aware and done)**

- Letter from hospital                       GP                       Text message – from whom \_\_\_\_\_
- IBD UK Tool                                   Via IBD team directly via clinical encounter
- Dep of Health letter                       Did not get one done                       Not aware there is such a thing

**If risk assessment done did you agree with your risk assessment?**

- Yes                       No - what is your perceived risk? \_\_\_\_\_

**Did you have concerns regarding your immunosuppression?**  Yes                       No

- If Yes - were these concerns adequately addressed?     Yes                       No

**Did you discontinue medication due to Coronavirus?**  Yes     No

- If Yes then why? \_\_\_\_\_
  - Was this following medical advice or of your own accord?     Yes                       No
  - Medication stopped \_\_\_\_\_
- Did stopping medication lead to an IBD flare up?     Yes                       No

**Do you think you have had Covid-19?**     Yes                       No

- If yes – were you                       tested (if yes pos/neg) \_\_\_\_\_                       self-diagnosed?

**Other relevant info:**
