# Supplementary material
Source: PubMed Central journal article supplement (PMC8040497)
Supplement: flgastro-2020-101633supp003.pdf [file flgastro-2020-101633supp003.pdf]

**Supplementary Table 1** - Perceived risk and concordance with risk assessments in patients within different risk groups.

|                                                             | Assigned risk group |           |          |       |
|-------------------------------------------------------------|---------------------|-----------|----------|-------|
|                                                             | High                | Moderate  | Low      | Total |
| <b>Agreed with assessment (P = 0.001)</b>                   |                     |           |          |       |
| <b>Yes</b>                                                  | 69 (95%)            | 81 (73%)  | 10 (77%) | 160   |
| <b>No</b>                                                   | 4 (5%)              | 30 (15%)  | 3 (23%)  | 37    |
| <b>Total assessed</b>                                       | 73                  | 111       | 13       | 197   |
| <b>Did not have an assessment - perceived risk</b>          |                     |           |          |       |
| <b>High</b>                                                 | 2 (13%)             | 11 (73%)  | 2 (13%)  | 15    |
| <b>Moderate</b>                                             | 1 (8%)              | 6 (50%)   | 5 (42%)  | 12    |
| <b>Low</b>                                                  | 1 (25%)             | 0 (0%)    | 3 (75%)  | 4     |
| <b>Had an assessment but did not agree - perceived risk</b> |                     |           |          |       |
| <b>High</b>                                                 | 0 (0%)              | 28 (100%) | 0 (0%)   | 28    |
| <b>Moderate</b>                                             | 4 (57%)             | 0 (0%)    | 3 (43%)  | 7     |
| <b>Low</b>                                                  | 0 (0%)              | 2 (100%)  | 0 (0%)   | 2     |
| <b>Overall concordance with risk assessment</b>             |                     |           |          |       |
| <b>High</b>                                                 | 71 (92%)            | 39 (30%)  | 2 (9%)   | 112   |
| <b>Moderate</b>                                             | 5 (6%)              | 87 (68%)  | 8 (35%)  | 100   |
| <b>Low</b>                                                  | 1 (1%)              | 2 (2%)    | 13 (57%) | 16    |
